1 **TITLE**

2

3 Identification and characterization of a new soybean promoter induced by  
4 *Phakopsora pachyrhizi*, the causal agent of Asian soybean rust.

5

6 Cabre L, Peyrard S, Sirven C, Gilles L, Pelissier B, Ducerf S<sup>#</sup>, Poussereau N.

7

8 Lisa Cabre : Univ Lyon, Université Lyon 1, CNRS, INSA-Lyon, Bayer SAS Crop Science Division,  
9 UMR 5240 MAP, Microbiologie, Adaptation et Pathogénie, 14 Impasse Pierre Baizet BP 99163,  
10 69263 Lyon Cedex 09, France. lisacabre@gmail.com

11 Stephane Peyrard : Bayer SAS, Crop Science Division, 14 impasse Pierre Baizet, BP 99163, 69263  
12 Lyon Cedex 09, France. stephane.peyrard@bayer.com

13 Catherine Sirven : Bayer SAS, Crop Science Division, 14 impasse Pierre Baizet, BP 99163, 69263  
14 Lyon Cedex 09, France. catherine.sirven@bayer.com

15 Laurine Gilles\* : Bayer SAS, Crop Science Division, 14 impasse Pierre Baizet, BP 99163, 69263 Lyon  
16 Cedex 09, France. laurine.gilles@ens-lyon.fr

17 Bernard Pelissier : Bayer SAS, Crop Science Division, 14 impasse Pierre Baizet, BP 99163, 69263  
18 Lyon Cedex 09, France. bernard.pelissier@bayer.com

19 Sophie Ducerf<sup>#</sup> : Bayer SAS, Crop Science Division, 14 impasse Pierre Baizet, BP 99163, 69263 Lyon  
20 Cedex 09, France. sophie.ducerf@bayer.com

21 Nathalie Poussereau : Univ Lyon, Université Lyon 1, CNRS, INSA-Lyon, Bayer SAS Crop Science  
22 Division, UMR 5240 MAP, Microbiologie, Adaptation et Pathogénie, 14 Impasse Pierre Baizet BP  
23 99163, 69263 Lyon Cedex 09, France. nathalie.poussereau@univ-lyon1.fr

24 \*Present address: Laboratoire de Reproduction et Développement des Plantes, ENS de Lyon 46, allée  
25 d'Italie, 69364 LYON Cedex 07, France.

26

27 <sup>#</sup>Corresponding author: Sophie Ducerf: sophie.ducerf@bayer.com

28  
29  
30  
31  
32  
33  
34  
35  
36  
37  
38  
39  
40  
41  
42  
43  
44  
45  
46  
47  
48  
49  
50  
51  
52  
53  
54  
55

**ABSTRACT**

**Background:** *Phakopsora pachyrhizi* is a biotrophic fungal pathogen responsible for the Asian soybean rust disease causing important yield losses in tropical and subtropical soybean-producing countries. *P. pachyrhizi* triggers important transcriptional changes in soybean plants during infection, with several hundreds of genes being either up- or downregulated.

**Results:** Based on published transcriptomic data, we identified a predicted chitinase gene, referred to as *GmCHIT1*, that was upregulated in the first hours of infection. We first confirmed this early induction and showed that this gene was expressed as early as 8 hours after *P. pachyrhizi* inoculation. To investigate the promoter of *GmCHIT1*, transgenic soybean plants expressing the green fluorescence protein (GFP) under the control of the *GmCHIT1* promoter were generated. Following inoculation of these transgenic plants with *P. pachyrhizi*, GFP fluorescence was detected in a limited area located around appressoria, the fungal penetration structures. Fluorescence was also observed after mechanical wounding whereas no variation in fluorescence of p*GmCHIT1*:GFP transgenic plants was detected after a treatment with an ethylene precursor or a methyl jasmonate analogue.

**Conclusion:** We identified a soybean chitinase promoter exhibiting an early induction by *P. pachyrhizi* located in the first infected soybean leaf cells. Our results on the induction of *GmCHIT1* promoter by *P. pachyrhizi* contribute to the identification of a new pathogen inducible promoter in soybean and beyond to the development of a strategy for the Asian soybean rust disease control using biotechnological approaches.

**KEYWORDS:** Soybean, *Phakopsora pachyrhizi*, induction, chitinase, promoter, GFP

## 56 BACKGROUND

57

58 Rusts are among the most damaging crop diseases, causing very severe losses in crop yield <sup>1</sup>. In  
59 particular, Asian soybean rust is the most destructive foliar disease of soybean (*Glycine max* (L.)  
60 Merr.) and is caused by the biotrophic basidiomycete fungus *Phakopsora pachyrhizi* Syd. & P. Syd <sup>2</sup>.  
61 Initially localized in Asia, *P. pachyrhizi* has spread across the world and reached the South American  
62 continent in the 2000s, bringing important economic losses to soybean growers. Brazil, one of the  
63 leading soybean-producing countries, is impacted by the disease each year. Highest damages on grain  
64 harvest between 2007 and 2014 reached 571.8 thousand tons, e.g., 6% of the national production  
65 <sup>3</sup>. Infection by *P. pachyrhizi* starts with the germination of uredospores on the soybean leaf, leading to  
66 the formation of an appressorium. From the appressorium *P. pachyrhizi* penetrates directly into the  
67 epidermal cells of its hosts. Between 24 and 48 hours later, fungal hyphae colonized infected tissues  
68 and haustoria are observed in the mesophyll cells. Approximately 5-8 days post infection, uredinia  
69 appear on the abaxial side of the leaves and new urediniospores are released, leading to inoculation of  
70 healthy plants through airborne spore dissemination <sup>4</sup>. Symptoms are characterized by tan-coloured  
71 lesions and chlorosis of the leaves. In the most severe cases, defoliation and quick maturation of  
72 soybean with a reduction of seed size and weight can be observed in a few days after initial infection  
73 <sup>5,6</sup>.

74 Today, the control of *P. pachyrhizi* is essentially based on fungicidal treatments. Demethylation  
75 inhibitors (DMIs) impairing sterol biosynthesis, as well as succinate dehydrogenase inhibitors (SDHIs)  
76 and quinone outside inhibitors (QoIs), blocking mitochondrial respiration, are the most commonly  
77 used fungicides <sup>7,8</sup>. However, the repetitive use of molecules with these three modes of action and the  
78 fungicide adaptation capability of the pathogen have resulted in a decrease in treatment efficacy <sup>3</sup>.  
79 Genetic resistance of soybean to *P. pachyrhizi* is well documented and could be seen as an alternative  
80 to the use of pesticides. Thus far, seven dominant R genes, named *Rpp1* to *Rpp7*, have been identified  
81 <sup>9-13</sup>. However, these resistance genes are only effective against specific isolates of *P. pachyrhizi* <sup>14</sup> and  
82 the resistance conferred by these genes can be easily overcome, making breeding solutions very  
83 challenging <sup>15</sup>. Today, no soybean cultivars resistant to most of the rust isolates are available. In this

84 context, biotechnological approaches are foreseen as alternative solutions to control Asian soybean  
85 rust <sup>8,16</sup>.

86 A common strategy in plant engineering for disease resistance is to overexpress a defence-related gene  
87 placed under the control of a constitutive promoter. However, permanent and high ectopic expression  
88 of such a gene can impact the plant's fitness and development <sup>17</sup>. These challenges can be overcome by  
89 using a pathogen-inducible promoter allowing transgene expression only when and where it is needed.

90 The advantage of these regulated promoters is well illustrated by the expression of the multi-pathogen  
91 resistant gene *Lr34res* in barley <sup>18</sup>. The *Lr34res* gene encoding an ATP-binding cassette (ABC)  
92 transporter was originally identified in wheat as providing durable resistance to 3 wheat rusts  
93 (*Puccinia triticina*, *P.striiformis*, *P.graminis*) and the powdery mildew (*Blumeria graminis* f.sp.  
94 *tritici*). This gene was successfully transferred in barley and conferred resistance against *Puccinia*  
95 *hordei* and the powdery mildew *Blumeria graminis* f.sp. *hordei*. However, *Lr34res* expression  
96 controlled by its native promoter resulted in negative effect on plant growth and fitness <sup>19</sup>. To avoid  
97 these pleiotropic effects, Boni *et al.* (2018) developed transgenic barley expressing the *Lrs34 res* gene  
98 placed under the control of the barley germin-like GER4 promoter, a pathogen inducible promoter <sup>20</sup>.

99 They observed that the negative pleiotropic effects were reduced compared to barley plants containing  
100 the same gene placed under control of its native promoter. The composition of the pathogen-inducible  
101 promoters has also to be considered since the promoter region may contain several *cis*-regulatory  
102 elements such as binding sites for transcription factors and/or regulatory proteins. These elements that  
103 regulate gene expression patterns can be activated by different stimuli <sup>21</sup>. As a consequence, pathogen-  
104 inducible promoters are often induced by other stimuli such as wounding and/or hormones. Many  
105 pathogen-inducible promoters have been studied in different plants <sup>20,22,23</sup>, but very few have been  
106 reported in soybean. For instance, *GmPPO12* (*Glyma04g14361*) promoter controlling a polyphenol  
107 oxidase has been found to be rapidly and strongly induced by *Phytophthora sojae* in transformed  
108 soybean hairy roots and two regions were identified as essential for promoter activity <sup>24</sup>. In addition,  
109 Liu *et al.* (2014) discovered 23 *cis*-regulatory elements responsible for the induction of several genes  
110 by the soybean cyst-nematode *Heterodera glycines* <sup>25</sup> and they proposed to consider them for synthetic  
111 promoter engineering.

112 Plant responses to pathogen attacks involve the activation of a set of genes coding for different  
113 proteins. Among them, pathogenesis-related (PR) proteins are produced and highly accumulated <sup>26</sup>.  
114 Chitinases represent a subset of pathogenesis-related proteins. These enzymes that belong to families  
115 18 and 19 of the glycosyl hydrolases<sup>27</sup>, have the ability to randomly hydrolyse beta-1,4-glycoside  
116 bonds of chitin, a major component of the fungal cell wall. The resulting chitin fragments act as a  
117 potent pathogen-associated molecular pattern (PAMP) that induces PAMP-triggered immunity <sup>27</sup>.  
118 Plant chitinases have also been shown to be implicated in the defence against insects; in response to  
119 abiotic stresses such as cold, drought or metal toxicity; and in plant development <sup>28,29</sup>.  
120 In this publication, we report the identification and characterization of the soybean chitinase promoter  
121 p*GmCHIT1* that we selected from a set of transcriptomic data<sup>30,31</sup>. This promoter drives both early and  
122 late overexpression of a chitinase encoding gene upon *P. pachyrhizi* infection. Its specificity to fungal  
123 exposure versus activation by different hormonal and abiotic stress pathways was evaluated through  
124 the generation of stable transgenic soybeans harbouring a p*GmCHIT1*:GFP fusion. Our study was  
125 carried out on the *P. pachyrhizi* / soybean pathosystem, allowing induction of the promoter by the  
126 pathogen in the crop of interest. To our knowledge, this is the first characterization of a soybean  
127 promoter inducible by Asian soybean rust.

128

129

## 130 **RESULTS**

131

### 132 **The soybean chitinase gene *GmCHIT1* is induced by Asian soybean rust**

133 Several transcriptomic data on soybean gene expression during *P. pachyrhizi* infection have been  
134 generated and published. In 2010, Tremblay *et al.* used DNA array to analyse gene expression in the  
135 palisade and mesophyll cells infected by the pathogen. They identified 685 upregulated genes 10 days  
136 after soybean rust inoculation (dpi), and most of them were related to plant defence response and  
137 metabolism<sup>30</sup>. In 2011, they used next-generation sequencing (NGS) to analyse soybean gene  
138 expression patterns in leaves and described 1,713 genes upregulated 10 dpi, with many of them  
139 encoding proteins involved in metabolism and transport <sup>31</sup>. Considering that upregulated genes are a

140 potential source of inducible promoters, we searched for genes upregulated in both experiments. We  
141 identified 220 common upregulated genes, and a ranking of these genes according to their fold change  
142 was determined for each experiment (see additional file 1: Table S1). Among the commonly  
143 upregulated genes, one-quarter (26%) were associated with metabolism function, 18% were implicated  
144 in signal transduction and 12% were annotated as transporters (see additional file 2: Figure S1).  
145 Eleven plant defence-related genes representing 5% of the commonly upregulated genes were also  
146 identified. Among them, two genes annotated as predicted chitinase (*Glyma.13G346700* and  
147 *Glyma.11G124500*) were highly induced at 10 dpi. They were also described as up-regulated 24 h  
148 post-infection, in agreement with SoyKB data (<http://soykb.org/>). Moreover, according to internal  
149 transcriptomic data, *Glyma.11G124500* revealed no induction after treatment with a chitin  
150 oligosaccharide (the chitin heptaose) unlike *Glyma.13G346700* (see additional file 3: Figure S2).  
151 Chitin is a major component of the fungal cell wall and can be detected by the host plant as a PAMP.  
152 Therefore, we selected *Glyma.11G124500* as potentially specifically induced by *P. pachyrhizi* during  
153 early (24 h) and late stages of infection (10 days).  
154 *Glyma.11G124500*, located on chromosome 11, includes a coding sequence of 705 bp with two exons,  
155 a 5'UTR of 57 bp and a 3'UTR of 217 bp. This gene encodes a protein (*Glyma.11G124500* 1. p) of  
156 235 amino acids with a glycosyl hydrolase motif of family 19 (PF00182 domain from amino acid 38  
157 to 235) and was annotated as a chitinase. This putative function was reinforced by a sequence  
158 comparison (see additional file 4: Figure S3 and additional file 5: Figure S4). *Glyma.11G124500* was  
159 therefore renamed *GmCHIT1*.  
160 Expression of *GmCHIT1* during infection of wild type soybean leaves by *P. pachyrhizi* was then  
161 monitored by RT-qPCR. *GmCHIT1* was expressed as early as 8 hpi (hours post-inoculation) (2.5-fold  
162 compared to the mock treatment), and its expression increased during infection reaching 6-7-fold  
163 compared to the mock treatment at 1-3 dpi. The highest level of *GmCHIT1* expression (300-fold  
164 compared to healthy leaves) was observed at a late stage of infection when the inoculated leaves were  
165 totally chlorotic and covered with sporulating uredinia (10 dpi) (Figure 1a). In our conditions, no  
166 visual symptoms were observed at 8 hpi and uredia appeared at 6/7 dpi, revealing that the gene was

167 induced before the emergence of disease symptoms (Figure 1a, b). According to the expression results,  
168 we selected the *GmCHIT1* promoter as a good candidate induced by *P. pachyrhizi*.

169

### 170 **Analysis of the activity of the *GmCHIT1* promoter in response to *P. pachyrhizi* inoculation**

171 To study the expression and inducibility of *GmCHIT1* promoter, a fragment of 3454 bp upstream of  
172 the coding sequence was selected. Indeed, analysis of this sequence with PLACE software<sup>32</sup> revealed  
173 several cis-regulatory elements related to pathogen infection (see additional file 6: Figure S5).  
174 Twenty-one W boxes (TGAC)<sup>33</sup> and 10 GT1 boxes (GAAAAA)<sup>34</sup> were identified. Five MYB  
175 recognition elements (GGATA)<sup>35</sup> were also found as well as two auxin (TGTCTC and KGTCCCAT)  
176<sup>36</sup> and two gibberellic acid-responsive elements (CAACT)<sup>37</sup>.

177 The activity of the *GmCHIT1* promoter following *P. pachyrhizi* inoculation was then evaluated via the  
178 generation of reporter stable transgenic soybeans. For this, the selected promoter region was fused to  
179 the GFP reporter gene (*pGmCHIT1*:GFP), and transgenic plants were selected. *P. pachyrhizi* spores  
180 were sprayed on the plants, and fluorescence surrounding the infection spots was clearly observed at  
181 24 and 72 hpi in three independent *pGmCHIT1*:GFP lines (Figure 2a (line 131); additional file 7  
182 Figure S6 (lines 129 and 133)). However, a low GFP signal was also observed in leaf veins in the  
183 absence of the fungal infection, revealing a basal expression of the promoter in fully developed 3-  
184 week-old soybean plants. GFP expression was followed by RT-qPCR and a low induction was  
185 detected at 72 hpi (Figure 2b). Western blot analysis revealed the presence of GFP in non-infected  
186 leaves and an accumulation of GFP-protein at 72 hpi (Figure 2c). To precise this over-accumulation, a  
187 confocal microscopy study was conducted on line 131 at 24 hpi when spores have germinated and  
188 differentiated appressoria. GFP fluorescence was particularly detectable around the fungal pathogen  
189 and more precisely in cells located around appressoria, the fungal penetration structures (Figure 3).

190

### 191 **Activity of the *GmCHIT1* promoter in different soybean tissues**

192 To determine the tissue specificity of the chitinase promoter, GFP fluorescence of plants from the 131  
193 line was investigated in roots, young leaves and flowers of non-infected plants. *pCsVMV*:GFP plants  
194 containing the strong constitutive Cassava Vein Mosaic Virus promoter were used as a positive

195 control. As expected, a strong GFP fluorescence was observed in all analysed tissues of plants  
196 transformed with pC<sub>s</sub>VMV:GFP, whereas no GFP signal was detected in WT soybean plants (Figure  
197 4). In the case of plants transformed with p*GmCHIT1*:GFP (line 131), a light GFP signal was detected  
198 in primary and some lateral roots. While GFP expression was observed in veins of developed leaves  
199 (Figures 2, 5 and 6), no signal was detectable in young leaves at this magnification (Figure 4). This  
200 low detection of GFP could be considered as the baseline expression of the *GmCHIT1* promoter in the  
201 different tissues observed.

202

### 203 **Activity of the *GmCHIT1* promoter in response to hormone and wounding treatments**

204 To evaluate the potential induction of the *GmCHIT1* promoter by other stimuli than fungal  
205 contamination, different hormonal treatments were performed on plants and the activity profile was  
206 evaluated in the line 131. For this, the plants were subjected to coronatine (methyl jasmonate  
207 analogue) and 1-aminocyclopropane-1-carboxylic acid (ACC, ethylene precursor) treatments. As *A.*  
208 *thaliana* *PDF1.2* promoter has been shown to be induced by jasmonate and ethylene<sup>22</sup>, p*PDF1.2*:GFP  
209 soybean plants (named *PDF1.2*) were used as positive controls for these investigations. As expected,  
210 fluorescence strongly increased from 24 to 72 h after coronatine or ACC treatments (Figure 5a-b). In  
211 the case of the p*GmCHIT1*:GFP plants, fluorescence intensity did not change after coronatine or ACC  
212 spray (Figure 5a-b), suggesting that p*GmCHIT1* was not induced by these hormonal treatments.  
213 Fluorescence intensity remained also unchanged after salicylic acid (SA) exposure in p*GmCHIT1*:GFP  
214 plants (line 131) (additional file 8 Figure S7). As we had no functional control to evaluate the  
215 efficiency of this last treatment, the expression of three *PR* genes (*GmPR1*, *GmPR2* and *GmPR3*)<sup>38</sup>,  
216 was followed by RT-qPCR in the leaves of plants from line 131. In our experimental conditions, only  
217 a low induction of *GmPR3* (2-fold change compared to mock) was detected in response to SA  
218 exposure (additional file 8 Figure S7). This last result did not allow to conclude on the efficiency of  
219 the treatment and consequently on the inducibility of p*GmCHIT1* by SA.

220 Lastly, *GmCHIT1* promoter response was monitored after mechanical wounding. A small GFP  
221 fluorescence was observed at 24 h post-wounding limited to the wounded area and still visible at 72 h



222 after the injury (Figure 6). The *GmCHIT1* promoter appeared to be induced by wounding with no  
223 propagation to adjacent tissues.

224

## 225 **DISCUSSION**

226

227 Today, biotechnology approaches can be considered to develop alternative strategies to control fungal  
228 diseases, and more specifically the rust pathogen *P. pachyrhizi*. In this context, many genes associated  
229 with disease resistance have been identified and proposed to develop transgenic plants capable of  
230 defending themselves against pathogens<sup>17,39,40</sup>. To drive the expression of these genes only during  
231 pathogen infection, the use of pathogen-inducible promoters is recommended. Such promoters have  
232 been isolated in several plants from genes associated with defence response<sup>41</sup>. This is the case for the  
233 barley germin-like GER4 promoter that controls the expression of a PR protein highly induced in  
234 response to biotrophic or necrotrophic pathogens<sup>20</sup>. Nevertheless, the identification and  
235 characterization of such promoters in soybean is still limited<sup>24,42</sup>. This work presents the identification  
236 of a soybean putative chitinase gene promoter (*pGmCHIT1*) and its activity profile in soybean plants.

237 Several studies have shown that genes associated with defence response, such as PR genes, are found  
238 to be induced during soybean rust inoculation in both resistant and susceptible soybeans<sup>43</sup>. Among  
239 them, the *GmCHIT1* gene coding for a putative chitinase was reported as upregulated during early (24  
240 hpi) and later (10 dpi) stages of *P. pachyrhizi* infection. We investigated the expression profile of this  
241 gene during the infectious process of *P. pachyrhizi* on soybean plants and confirmed that the  
242 expression of this gene was detectable as early as 8 hpi, remained constant from 24 to 72 hpi and  
243 increased drastically at 10 dpi. Microscopic observations of the infectious development of *P.*  
244 *pachyrhizi* revealed that appressorium formation and rust penetration in plant tissues occur between  
245 six and twelve hours after urediniospore inoculation. Between 24 and 48 hpi, the fungus mainly forms  
246 haustoria and this differentiation step is rapidly followed by the fungal growth inside the host tissues<sup>44</sup>.  
247 Considering *GmCHIT1* expression, we can assume that it could be induced through a plant signal  
248 during the appressorium formation and/or fungal penetration, and its expression could be proportional  
249 to the quantity of mycelia developing inside the plant tissues.

250 Heterologous systems are often used to study gene expression, but results produced in these  
251 experiments are limited because promoter regulation may depend on the genetic background of the  
252 plant species under investigation <sup>45-47</sup>. A transient system could allow a rapid investigation of a  
253 promoter's activity, and the opportunity to select the smallest inducible promoter region. However,  
254 transient transformation of soybean is difficult to implement, and results are not still reproducible. We  
255 therefore generated stable transgenic soybean plants harbouring GFP placed under the control of the  
256 *GmCHIT1* promoter. This approach gave us the opportunity to highlight the local induction of the  
257 plant chitinase promoter in soybean cells surrounding fungal appressoria, the fungal penetration  
258 structures (Figure 3).

259 Mechanical injuries of plant tissues can provide an entrance for pathogen invasion. Therefore, several  
260 wound-induced genes are also involved in plant defence pathways against invading fungi <sup>48</sup>. *P.*  
261 *pachyrhizi* penetrates directly the epidermal cells of the leaves rather than the stomata <sup>4</sup> and this action  
262 leads to the collapse of the epidermal cells. In this particular case of interaction, it is not surprising to  
263 observe that p*GmCHIT1* is also induced after wounding. The pattern of p*GmCHIT1* response to  
264 wounding is similar to the one observed by Hernandez-Garcia and Finer in wounded soybean plants  
265 harbouring the transcriptional fusion of the GFP and *GmERF3* promoter <sup>42</sup>. However, in the context of  
266 the Asian soybean rust infection, we cannot conclude that p*GmCHIT1* induction is the result of  
267 signalling associated solely with the tissue injury, the rust infection or both.

268 Some plant chitinase promoters have already been studied. Thus, the *BjChp* chitinase promoter of  
269 *Brassica juncea* has been reported to be induced by the pathogen *Alternaria brassicae*, jasmonic acid  
270 and wounding in *A. thaliana* <sup>49</sup>. *BjChp* promoter activity was also observed surrounding the necrotic  
271 lesions at 48 hpi. Another chitinase promoter of *Phaseolus vulgaris* (*PvChi4*) promoter has been  
272 reported to be expressed in lateral roots and reproductive organs of non-stressed *A. thaliana* plants  
273 <sup>50</sup> and it was also induced by heat treatment and UV light. Additionally, the promoter of the chitinase  
274 *AtEP3*, the closest *A. thaliana* orthologue of *GmCHIT1*, was shown to be early induced by  
275 *Xanthomonas campestris* at 1, 6 and 24 hpi but downregulated by wounding <sup>51,52</sup>. These results  
276 highlight that chitinase promoters can be regulated by biotic or abiotic stresses or both.

277 Transcriptional regulation of defence genes under biotic stress is regulated by many *cis*-elements  
278 localized in the promoter <sup>21</sup>. Among them, GCC-box and W-boxes have been shown to be inducible by  
279 pathogens and wounding <sup>21</sup>. In the *ChiIV3* chitinase promoter of pepper, one W-box located in the -  
280 712/-459 bp region was described as essential to trigger the induction after *Phytophthora capsici*  
281 contamination <sup>53</sup>. W-box refers to the binding site of WRKY transcription factors <sup>33</sup>, and in soybean,  
282 these regulators have been shown to be implicated in the response to *P. pachyrhizi* <sup>54</sup>. In the *GmCHIT1*  
283 promoter, 21 W-boxes have been identified. In addition, 10 GT1-boxes and 5 MYB recognition  
284 elements have also been found. It has been demonstrated that GT1-boxes are responsible for the  
285 induction of defence genes by pathogen and high salinity stress, as it has been described for the  
286 soybean promoter of the calmodulin *SCaM-4*. <sup>55</sup>. MYB recognition elements were found in defence  
287 gene promoters and could be implicated in response to abiotic stress and hormone treatment <sup>56</sup>.  
288 Finally, two auxin and two gibberellic acid responsive elements have been found in the *GmCHIT1*  
289 promoter. These observations suggest that *pGmCHIT1* could be potentially activated by these  
290 hormones. It would be interesting to investigate whether the *cis*-regulating elements found in the  
291 *GmCHIT1* promoter are essential and sufficient to trigger a response to *P. pachyrhizi*.  
292 Fungal infection can induce different plant hormone pathways depending on the lifestyle of the  
293 pathogen. It is well-admitted that salicylate signalling is implicated in defence against biotrophic fungi  
294 and jasmonate together with ethylene participate in the defence against necrotrophic fungi <sup>57</sup>.  
295 However, a study of non-host interaction between *P. pachyrhizi* and *A. thaliana* has revealed that  
296 despite the biotrophic lifestyle of *P. pachyrhizi*, the pathogen activates marker genes of necrotrophic  
297 infection <sup>58</sup>. It has been suggested that the fungus would mimic a necrotrophic behaviour at the initial  
298 stage of infection to promote its development inside the host tissues <sup>59</sup>. In this context, one would  
299 expect *P. pachyrhizi* development to induce the jasmonic acid or ethylene pathway at early time-points  
300 after inoculation and salicylic acid-related genes at later times. However, expression data during the  
301 early and late stages of *P. pachyrhizi* development in soybean did not reveal clear evidence of  
302 activation of either the salicylate, jasmonic acid or ethylene pathway <sup>30,43,59</sup>. Nevertheless, it was  
303 surprising to observe that the *GmCHIT1* promoter was not induced by any hormonal treatments  
304 assessed in our study. Indeed, several PR proteins have been shown to be activated by plant hormones

305 <sup>60</sup>. For instance, a chitinase from rice has been reported to be induced by jasmonic acid and ethylene  
306 48 h post-treatment <sup>61</sup>. However, unlike in Mazarei *et al.* <sup>62</sup>, in our experimental conditions, *GmPRI*  
307 was not induced after salicylic acid treatment and only a slight induction of *GmPR3* was observed. It is  
308 unclear at this stage whether the results reflect a lack of efficacy of salicylic acid treatment or an  
309 insensitivity of p*GmCHIT1* to this hormone.

310 Basal *GmCHIT1* promoter activity in non-contaminated soybean tissues was also investigated.  
311 Visualization of GFP expression revealed that p*GmCHIT1* was expressed in the veins of fully  
312 developed leaves and in roots but not in young leaves and flowers. Roots are permanently exposed to  
313 soil pathogens that can penetrate the tissues because of micro-wounds and the absence of lignified  
314 barriers <sup>63</sup>. This basal expression level in different soybean tissues/organs together with the induction  
315 under rust attack might reflect the potential roles of this chitinase in physiological processes of growth  
316 and development as much as in pathogen protection. Nevertheless, despite the basal expression of this  
317 promoter, it can be considered as an interesting tool to monitor expression of defence genes. Indeed,  
318 in addition to its inducible characteristic, we observed that its basal expression in soybean tissues  
319 remained lower than the constitutive expression of CsVMV promoter. This makes p*GmCHIT1* a prime  
320 candidate compared to constitutive promoters.

321

## 322 **CONCLUSIONS**

323

324 Promoters are the primary regulators of gene expression at the transcriptional level and are considered  
325 as key elements to control genes of interest in transgenic organisms. Pathogen inducible promoters  
326 allowing transgene expression only when and where it is needed, are interesting tools for the  
327 development of biotechnological approaches to control bacterial or fungal diseases. In this study, we  
328 identified p*GmCHIT1*, a promoter of a soybean predicted chitinase gene expressed during the first  
329 hours of the Asian soybean rust disease. Moreover, this promoter is reported as locally activated by *P.*  
330 *pachyrhizi* on plant tissue. To our knowledge, p*GmCHIT1* is the only promoter isolated to date in  
331 soybean with such traits. These characteristics suggest that it could be therefore considered as a  
332 candidate for driving defence genes in genetically engineered soybean.

333

## 334 **METHODS**

335

### 336 **Construction of the transformation vectors**

337 The GFP reporter gene<sup>64</sup> was amplified by PCR with primers gfp-F/gfp-R (see additional file 9: Table  
338 S2) and cloned downstream of the CsVMV promoter from Cassava Vein Mosaic Virus<sup>65</sup>. The *PDF1.2*  
339 promoter from *Arabidopsis thaliana*<sup>22</sup> was amplified by PCR using primers pdf1.2-F/ pdf1.2-R (see  
340 additional file 9: Table S2) and cloned to drive the expression of the GFP-encoding sequence.  
341 Upstream of the *Glyma.11G124500* gene-encoding sequence (based on *G. max* genome sequence from  
342 <https://phytozome.jgi.doe.gov/pz/portal.html>), a 3454 bp segment considered as part of the *GmCHIT1*  
343 promoter was synthesized by Eurofins genomic (Germany). The promoter was then cloned to drive the  
344 expression of the GFP-encoding gene. Each GFP construct was transferred to *A. tumefaciens* strain  
345 LBA4404. In all vectors, the HPPD (hydroxyphenylpyruvate dioxygenase) gene driven by the 35S  
346 promoter was used as a selectable marker for soybean transformation<sup>66</sup>.

347

### 348 **Soybean cultivation**

349 Seeds of soybean cultivar Thorne, susceptible to *P. pachyrhizi*, were sown in pots containing  
350 SteckMedium substrate (Klasmann-Deilmann GmbH, Germany) for germination. After 3 weeks, the  
351 plants were transferred into larger pots for development and eventually seed production. Greenhouse  
352 conditions were as follows: temperature of 24 °C day/22 °C night with a photoperiod of 16 h of day  
353 under a light intensity of 270  $\mu\text{E}\cdot\text{m}^{-2}\cdot\text{s}^{-1}$  and 70% relative humidity.

354

### 355 **Soybean transformation**

356 Seeds were surface sterilized for 24 h in a desiccator by chlorine gas generated with a mixture of 150  
357 ml Domestos containing 4.5% NaClO w/w (Unilever) and 5 ml of HCl (37%). Sterile seeds were then  
358 hydrated overnight in sterile deionized water. Cotyledons of germinated seeds were dissected by  
359 removing the seed coat and by splitting the seeds into 2 halves using a scalpel blade. The half-seeds  
360 were immersed for 30 min in 10% W/V Gamborg's medium (Gamborg *et al.*, 1968) containing 30 g/l

361 sucrose, 7.4  $\mu\text{M}$  BAP (6-benzylaminopurine), 0.7  $\mu\text{M}$  GA3 (gibberellic acid A3), 3.3 mM cysteine, 1  
362 mM dithiothreitol, 200  $\mu\text{M}$  acetosyringone, 20 mM MES, pH 5.4 and the bacterium *Agrobacterium*  
363 *tumefaciens* at a final  $\text{OD}_{600\text{nm}}$  of 0.8. Next, cotyledons were transferred to Petri dishes, adaxial side  
364 down, onto 3 layers of Whatman  $\text{\textcircled{R}}$  paper pre-soaked with 10 ml of Gamborg's medium. Plates were  
365 transferred to a tissue culture room for 5 days at 24°C, 16 h light ( $180 \mu\text{E}\cdot\text{m}^{-2}\cdot\text{s}^{-1}$ ) and 75% relative  
366 humidity. Shoots were induced by transferring the cotyledons to full-strength Gamborg's medium  
367 containing 30 g/l sucrose, 7.4  $\mu\text{M}$  BAP, 3 mM MES pH 5.6 and 8 g/l noble agar. Antibiotics ticarcillin  
368 (50 mg/l), cefotaxime (50 mg/l), vancomycin (50 mg/l) and the herbicide Tembotrione<sup>TM</sup> (0.2 mg/l)  
369 used as selectable marker were added after autoclaving. After one month on the shoot induction  
370 medium, white shoots were removed and cotyledons were transferred on a shoot elongation medium  
371 containing Murashige & Skoog (MS) salts <sup>67</sup>, 3.2 g/l Gamborg's vitamins , 30 g/l sucrose, 100 mg/l  
372 pyroglutamic acid, 50 mg/l asparagine, 0.28  $\mu\text{M}$  zeatin riboside, 0.57  $\mu\text{M}$  indol-3-acetic acid, 14.8  $\mu\text{M}$   
373 GA3, 3 mM MES, pH 5.6 and 8 g/l noble agar. Antibiotics and the herbicide were kept at the same  
374 concentrations previously described. After one month, elongated shoots were cut and transferred to a  
375 rooting medium consisting of half-strength MS salts, half-strength B5 vitamins, 15 g/l sucrose, and 8  
376 g/l noble agar. The same antibiotics as previously described were added after autoclaving, but the  
377 selectable marker was omitted. When roots were sufficiently developed, the shoots were individually  
378 transplanted to a greenhouse and cultivated using the conditions previously described.

379

### 380 **Characterization of transgenic plants**

381 Regenerated T0 events were confirmed for the presence of the selectable marker gene with an HPPD  
382 lateral flow test (AMAR Immunodiagnostics) using the experimental instructions recommended by the  
383 provider. To pick up T1 HPPD/GFP-positive events, germinated seeds were watered with an 8‰  
384 solution of the herbicide Isoxaflutole<sup>TM</sup> to eliminate null segregant plants. Plants showing no herbicide  
385 symptoms were subsequently tested for GFP fluorescence and used for further analysis. Homozygous  
386 single-locus plants were selected either in T1 or T2 segregating generations by ddPCR analysis. T1 or  
387 T2 plants were used depending on the availability of the material.

388

### 389 **Fungal contamination of soybean plants**

390 A dehydrated stock of spores of *P. pachyrhizi* stored in liquid nitrogen (isolate MG2006, Mato Grosso,  
391 Brazil 2006) was used as a routine source of inoculum. Twenty-four hours before plant inoculation,  
392 cryo-tubes were opened and placed in a controlled growth chamber (20°C, dark, 70% relative  
393 humidity) to slowly rehydrate the spores. The spores were finally suspended in sterilized water  
394 containing 0.01% Tween 20 to reach a final concentration of 100,000 spores/ml. Three-week-old  
395 soybean plants were sprayed with the spores until run-off and incubated in a growth chamber  
396 (temperature 24°C, dark, 100% relative humidity) for 24 h before being transferred to a developing  
397 chamber (temperature of 24°C, 16 h light/8 h night, light intensity 15  $\mu\text{E}\cdot\text{m}^{-2}\cdot\text{s}^{-1}$  and 80% relative  
398 humidity). All experiments were conducted according to the recommendations of the French biosafety  
399 agency (Haut Conseil des Biotechnologies).

400

### 401 **Treatment of detached soybean leaves**

402 First and second trifoliolate leaves of 6-week-old plants were excised and transferred to layers of  
403 Whatman® paper wetted with 6 ml of sterile distilled water. Leaf petioles were wrapped with water-  
404 soaked cotton to increase organ survival. Different hormone treatments were conducted by spraying  
405 leaves with either 20 mM of ACC (ethylene precursor) or 2.5 mM solution of salicylic acid (SA) in  
406 sterile water or 0.25 mM of coronatine (methyl jasmonate analogue) in 1% EC premix solution  
407 (phenyl sulfonate 5%, emulsogen EL360 7%, isophorone 40% and methyloleate 48%). Sterile distilled  
408 water was used as mock for ACC and SA treatments, and 1% EC premix was used as mock for  
409 coronatine spray. Leaf wounding was realized with a sterile scalpel blade. After the different  
410 treatments, the leaves were incubated in the same growth chamber used for soybean transformation.  
411 Macroscopic observations and fluorescence intensity measurement were performed at 24, 48 and 72 h  
412 post-treatment.

413

### 414 **Expression profiling by quantitative PCR analysis**

415 Samples were composed of four foliar discs from leaves of a soybean plant, and three independent  
416 biological replicates were performed. Total RNA was extracted using the RNeasy® Plant Mini Kit

417 (Qiagen, Netherlands) and purified with the TURBO DNA-free™ Kit (Invitrogen, Carlsbad, CA).  
418 DNA-free total RNA (1 µg) was used to synthesize cDNA with the ThermoScript™ RT-PCR System  
419 kit (Invitrogen, Carlsbad, CA) according to the manufacturer's recommendations. For RT-qPCR, 0.02  
420 µg of cDNA was used in a 20 µl reaction containing 10 µl of SsoAdvanced™ Universal SYBR® Green  
421 Supermix (Bio-Rad, US), 6 µM of forward and reverse primers and 3 µl of RNase-free water. RT-  
422 qPCR was performed using the LightCycler® 480. The thermocycling conditions were followed as  
423 recommended by the supplier. The expression of the chitinase gene was determined after soybean rust  
424 inoculation by using specific primers (see additional file 9: Table S2). The genes coding for actin  
425 (GenBank: NM\_001289231.2) and a hypothetical protein (GenBank: BE330043)<sup>65</sup> (primer sequences  
426 in additional file 9: Table S2) were used as endogenous reference genes for normalization<sup>68</sup> using the  
427 Ct value method. Specific primers of *GmPR1* (GenBank: BU5773813), *GmPR2* (GenBank: M37753)  
428 and *GmPR3* (GenBank: AF202731) were used to determine the expression of those *PR* genes after  
429 salicylic acid treatment. In this case, the genes coding for actin and an elongation factor (GenBank:  
430 NM\_001249608.2) were used for normalization (see additional file 9: Table S2) with the Ct value  
431 method.

432

### 433 **Western blot analysis**

434 Leaf samples from wild-type (WT) plants and plants from line 131 were harvested 72 h after *P.*  
435 *pachyrhizi* contamination or mock treatment. Proteins were extracted from four foliar discs of the  
436 same soybean plant with 250 µl of extraction buffer (Tris-HCl 100 mM, NaCl 100 mM, DTT 0.04%)  
437 and placed on ice for 10 min before centrifugation at 4°C for 10 min. The protein concentration was  
438 determined with the Bradford method using the Bio-Rad Protein assay dye reagent solution. For  
439 denaturation, 1 volume of Laemmli buffer (Bio-Rad, US) was added to 1 volume of extracted proteins  
440 (30 µg). The mixture was kept for 5 min at 95°C and 5 min on ice before loading on a TGX 4-20%  
441 Strainfree (Bio-Rad US) gel immersed in TGS 1X buffer. After migration, separated proteins were  
442 transferred onto a membrane by using Trans-Blot® Turbo™ Midi Nitrocellulose Transfer Packs (Bio-  
443 Rad) and the TransBlot Turbo device (Bio-Rad, US). Membrane blocking and incubation with the  
444 antibodies were performed as suggested by the provider. GFP antibodies (Sigma) and Immun-Star



445 Goat Anti-Rabbit (GAR)-HRP Conjugate antibody were used. Antibody detection was realized with  
446 the Clarity™ Western ECL (Bio-Rad, US) kit following the supplier's instructions. Finally, the  
447 ChemiDoc™ Touch camera (Bio-Rad, US) was used to record the results.

448

#### 449 **Visualization of GFP expression**

450 GFP fluorescence was analysed with a Leica Z16 APO A dissection scope equipped with a GFP filter.  
451 For the detection of fluorescence after rust inoculation, the parameters were set as follows: camera  
452 lens 1 x, magnification 115 x, gain 2 and exposure time 500 ms. For detection of the GFP fluorescence  
453 in the different soybean tissues without infection, the camera lens was set at camera lens 0.5 x,  
454 magnification at 6.95 x for roots and young trifoliolate leaves and 15 x for flowers, gain 3, exposure  
455 time 500 ms. For hormonal treatments and wounding, the following parameters were used: camera  
456 lens 1 x, magnification 6.95 x, gain 3 and exposure time 1 s. Fluorescence intensity measurement was  
457 performed using MetaMorph software *via* greyscale value.

458

#### 459 **Confocal microscopy**

460 Leaf samples of soybean line 131 expressing the transcriptomic fusion *pGmCHIT1:GFP* were  
461 harvested 24 h post-inoculation. The samples were first stained in an aqueous calcofluor white  
462 solution (0.01 mg/ml) for 5 min before being washed 3 times in water for 5 min. Samples were  
463 mounted in water under slides (VWR® microscope slides: ground edges 45°, 76 x 26 mm) and cover  
464 glass (VWR® cover glass: 22 x 32 mm). Observations were conducted with a ZEISS LSM 800  
465 microscope using the 10x objective. To visualize GFP fluorescence, a 487 nm wavelength laser was  
466 used for excitation and light emission was captured at 560 nm. For the imaging of calcofluor  
467 fluorescence, light excitation was set at a wavelength of 400 nm and emission was captured at 487 nm.

468

469

#### 470 **ETHICS APPROVAL AND CONSENT TO PARTICIPATE**

471 Not applicable

472

473 CONSENT FOR PUBLICATION

474 Not applicable

475

476 AVAILABILITY OF DATA AND MATERIAL

477 All the data and material generated are BASF property.

478

479 COMPETING INTERESTS

480 All authors except NP and LG are inventors of the linked patent WO2018217474. SD, BP, SP, and CS  
481 are employees of Bayer Company.

482

483 FUNDING

484 This work was carried out within the framework of a CIFRE (Conventions Industrielles de Formation  
485 par la REcherche) PhD. The CIFRE was entirely funded by Bayer and the doctoral student worked in  
486 collaboration with the public laboratory of the CNRS (Centre National de la Recherche Scientifique)  
487 UMR 5240 Microbiologie Adaptation Pathogénie. ANRT (Agence Nationale de Recherche et de la  
488 Technologie) is responsible for the implementation of CIFRE financing.

489

490 AUTHOR'S CONTRIBUTIONS

491 NP, BP, SD and LC conceived and designed the experiments. SP performed the gene expression  
492 analyses, LG the soybean transformations and LC the rest of the experiments. NP, BP, SD, CS, SP and  
493 LC analysed the data. NP, BP, SD and LC wrote the paper. All the authors have read and approved the  
494 manuscript.

495

496 ACKNOWLEDGEMENTS

497 We gratefully acknowledge Pr. Ulrich Schaffrath, Dr. Marc-Henri Lebrun, Dr. Frank Meulewaeter and  
498 Dr. Florent Villiers for their advices and discussions as well as for their comments on the manuscript.

499 We also thank Didier Joiris for the soybean culture and its excellent work in greenhouse and Laura  
500 Velazquez for her contribution on the project.

501

## 502 REFERENCES

503

- 504 1. 1. Kolmer, J. A., Ordonez, M. E. & Groth, J. V. The Rust Fungi. in *Encyclopedia of Life*  
505 *Sciences* (ed. John Wiley & Sons, Ltd) (John Wiley & Sons, Ltd, 2009).  
506 doi:10.1002/9780470015902.a0021264.
- 507 2. Echeveste da Rosa, C. R. Asian Soybean Rust Resistance: An Overview. *Journal of Plant*  
508 *Pathology & Microbiology* **06**, (2015).
- 509 3. Godoy, C. V. *et al.* Asian soybean rust in Brazil: past, present, and future. *Pesquisa Agropecuária*  
510 *Brasileira* **51**, 407–421 (2016).
- 511 4. Goellner, K. *et al.* *Phakopsora pachyrhizi*, the causal agent of Asian soybean rust. *Molecular*  
512 *Plant Pathology* **11**, 169–177 (2010).
- 513 5. Hartman, G. L., Miles, M. R. & Frederick, R. D. Breeding for Resistance to Soybean Rust. *Plant*  
514 *Disease* **89**, 664–666 (2005).
- 515 6. Kumudini, S., Godoy, C. V., Board, J. E., Omielan, J. & Tollenaar, M. Mechanisms Involved in  
516 Soybean Rust-Induced Yield Reduction. *Crop Science* **48**, 2334–2342 (2008).
- 517 7. Miles, M. R. *et al.* International Fungicide Efficacy Trials for the Management of Soybean Rust.  
518 *Plant Disease* **91**, 1450–1458 (2007).
- 519 8. Langenbach, C., Campe, R., Beyer, S. F., Mueller, A. N. & Conrath, U. Fighting Asian Soybean  
520 Rust. *Front Plant Sci* **7**, (2016).
- 521 9. Bromfield, K. R. & Hartwig, E. E. Resistance to Soybean Rust and Mode of Inheritance. 2 (1980).
- 522 10. Childs, S. P. *et al.* Discovery of a seventh Rpp soybean rust resistance locus in soybean accession  
523 PI 605823. *Theor Appl Genet* **131**, 27–41 (2018).
- 524 11. Garcia, A. *et al.* Molecular mapping of soybean rust (*Phakopsora pachyrhizi*) resistance genes:  
525 discovery of a novel locus and alleles. *Theoretical and Applied Genetics* **117**, 545–553 (2008).

- 526 12. Hartwig, E. E. Identification of a Fourth Major Gene Conferring Resistance to Soybean Rust 1.  
527 *Crop Science* **26**, 1135–1136 (1986).
- 528 13. King, Z. R. *et al.* A novel *Phakopsora pachyrhizi* resistance allele (Rpp) contributed by PI  
529 567068A. *Theoretical and Applied Genetics* **129**, 517–534 (2016).
- 530 14. Miles, M. R. *et al.* Characterizing resistance to *Phakopsora pachyrhizi* in soybean. *Plant Disease*  
531 **95**, 577–581 (2011).
- 532 15. Yorinori, J. T. *et al.* Epidemics of Soybean Rust (*Phakopsora pachyrhizi*) in Brazil and Paraguay  
533 from 2001 to 2003. *Plant Disease* **89**, 675–677 (2005).
- 534 16. Kawashima, C. G. *et al.* A pigeonpea gene confers resistance to Asian soybean rust in soybean.  
535 *Nature Biotechnology* **34**, 661–665 (2016).
- 536 17. Gurr, S. J. & Rushton, P. J. Engineering plants with increased disease resistance: what are we  
537 going to express? *Trends in Biotechnology* **23**, 275–282 (2005).
- 538 18. Boni, R. *et al.* Pathogen-inducible Ta-Lr34res expression in heterologous barley confers disease  
539 resistance without negative pleiotropic effects. *Plant Biotechnol J* **16**, 245–253 (2018).
- 540 19. Risk, J. M. *et al.* The wheat Lr34 gene provides resistance against multiple fungal pathogens in  
541 barley. *Plant Biotechnology Journal* **11**, 847–854 (2013).
- 542 20. Himmelbach, A. *et al.* Promoters of the Barley Germin-Like GER4 Gene Cluster Enable Strong  
543 Transgene Expression in Response to Pathogen Attack. *The Plant Cell* **22**, 937–952 (2010).
- 544 21. Muthusamy, S., Sivalingam, P., Sridhar, J. & Singh, D. Biotic stress inducible promoters in crop  
545 plants- a review. 13 (2017).
- 546 22. Manners, J. M. *et al.* The promoter of the plant defensin gene PDF1. 2 from Arabidopsis is  
547 systemically activated by fungal pathogens and responds to methyl jasmonate but not to salicylic  
548 acid. *Plant molecular biology* **38**, 1071–1080 (1998).
- 549 23. Yang, F. *et al.* Functional analysis of the GRMZM2G174449 promoter to identify *Rhizoctonia*  
550 *solani*-inducible *cis*-elements in maize. *BMC Plant Biol* **17**, (2017).
- 551 24. Chai, C. *et al.* Identification and Functional Characterization of the Soybean GmaPPO12  
552 Promoter Conferring *Phytophthora sojae* Induced Expression. *PLoS ONE* **8**, e67670 (2013).

- 553 25. Liu, W. *et al.* Computational discovery of soybean promoter *cis*-regulatory elements for the  
554 construction of soybean cyst nematode-inducible synthetic promoters. *Plant Biotechnology*  
555 *Journal* **12**, 1015–1026 (2014).
- 556 26. Ebrahim, S., Usha, K. & Singh, B. Pathogenesis Related (PR) Proteins in Plant Defense  
557 Mechanism. *12* (2011).
- 558 27. Grover, A. Plant Chitinases: Genetic Diversity and Physiological Roles. *Critical Reviews in Plant*  
559 *Sciences - CRIT REV PLANT SCI* **31**, 57–73 (2012).
- 560 28. Kumar, M. *et al.* Chitinases—Potential Candidates for Enhanced Plant Resistance towards Fungal  
561 Pathogens. *Agriculture* **8**, 88 (2018).
- 562 29. Gálusová, T. *et al.* Variable responses of soybean chitinases to arsenic and cadmium stress at the  
563 whole plant level. *Plant Growth Regul* **76**, 147–155 (2015).
- 564 30. Tremblay, A., Hosseini, P., Alkharouf, N. W., Li, S. & Matthews, B. F. Transcriptome analysis of  
565 a compatible response by *Glycine max* to *Phakopsora pachyrhizi* infection. *Plant Science* **179**,  
566 183–193 (2010).
- 567 31. Tremblay, A., Hosseini, P., Alkharouf, N. W., Li, S. & Matthews, B. F. Gene Expression in  
568 Leaves of Susceptible *Glycine max* during Infection with *Phakopsora pachyrhizi* Using Next  
569 Generation Sequencing. *Sequencing* **2011**, 1–14 (2011).
- 570 32. Higo, K., Ugawa, Y., Iwamoto, M. & Korenaga, T. Plant *cis*-acting regulatory DNA elements  
571 (PLACE) database: 1999. *Nucleic Acids Res* **27**, 297–300 (1999).
- 572 33. Eulgem, T., Rushton, P. J., Robatzek, S. & Somssich, I. E. The WRKY superfamily of plant  
573 transcription factors. *Trends in Plant Science* **5**, 199–206 (2000).
- 574 34. Zühlke, R. D., Pitt, G. S., Deisseroth, K., Tsien, R. W. & Reuter, H. Calmodulin supports both  
575 inactivation and facilitation of L-type calcium channels. *Nature* **399**, 159–162 (1999).
- 576 35. Martin, C. & Paz-Ares, J. MYB transcription factors in plants. *Trends in Genetics* **13**, 67–73  
577 (1997).
- 578 36. Hagen, G. & Guilfoyle, T. Auxin-responsive gene expression: genes, promoters and regulatory  
579 factors. in *Auxin Molecular Biology* (eds. Perrot-Rechenmann, C. & Hagen, G.) 373–385  
580 (Springer Netherlands, 2002). doi:10.1007/978-94-010-0377-3\_9.

- 581 37. Sutoh, K. & Yamauchi, D. Two *cis*-acting elements necessary and sufficient for gibberellin-  
582 upregulated proteinase expression in rice seeds. *The Plant Journal* **34**, 635–645 (2003).
- 583 38. Durner, J., Shah, J. & Klessig, D. F. Salicylic acid and disease resistance in plants. *Trends in*  
584 *Plant Science* **2**, 266–274 (1997).
- 585 39. Ali, S. *et al.* Isolation and molecular characterization of pathogenesis related PR2 gene and its  
586 promoter from *Brassica juncea*. *Biologia Plantarum* **61**, 763–773 (2017).
- 587 40. Silva, M. S. *et al.* Review: Potential biotechnological assets related to plant immunity modulation  
588 applicable in engineering disease-resistant crops. *Plant Science* **270**, 72–84 (2018).
- 589 41. Smirnova, O. G. & Kochetov, A. V. Promoters of plant genes responsive to pathogen invasion.  
590 *Russian Journal of Genetics: Applied Research* **5**, 254–261 (2015).
- 591 42. Hernandez-Garcia, C. M. & Finer, J. J. A novel *cis*-acting element in the GmERF3 promoter  
592 contributes to inducible gene expression in soybean and tobacco after wounding. *Plant Cell*  
593 *Reports* **35**, 303–316 (2016).
- 594 43. van de Mortel, M. *et al.* Distinct biphasic mRNA changes in response to Asian soybean rust  
595 infection. *Molecular Plant-Microbe Interactions* **20**, 887–899 (2007).
- 596 44. Schneider, K. T. *et al.* Biphasic Gene Expression Changes Elicited by *Phakopsora pachyrhizi* in  
597 Soybean Correlate with Fungal Penetration and Haustoria Formation. *Plant Physiology* **157**, 355–  
598 371 (2011).
- 599 45. Martini, N., Egen, M., Rüntz, I. & Strittmatter, G. Promoter sequences of a potato pathogenesis-  
600 related gene mediate transcriptional activation selectively upon fungal infection. *Molecular and*  
601 *General Genetics MGG* **236**, 179–186 (1993).
- 602 46. Malnoy, M., Reynoird, J. P., Borejsza-Wysocka, E. E. & Aldwinckle, H. S. Activation of the  
603 pathogen-inducible *Gst1* promoter of potato after elicitation by *Venturia inaequalis* and *Erwinia*  
604 *amylovora* in transgenic apple (*Malus domestica*). *Transgenic Res* **15**, 83–93 (2006).
- 605 47. Zou, X. *et al.* Activation of three pathogen-inducible promoters in transgenic citrus (*Citrus*  
606 *sinensis* Osbeck) after *Xanthomonas axonopodis* pv. *citri* infection and wounding. *Plant Cell,*  
607 *Tissue and Organ Culture (PCTOC)* **117**, 85–98 (2014).

- 608 48. Park, S. H. *et al.* Wound-inducible expression of the OsDof1 gene promoter in a Ds insertion  
609 mutant and transgenic plants. *Plant Biotechnol Rep* **8**, 305–313 (2014).
- 610 49. Rawat, S., Ali, S., Mittra, B. & Grover, A. Expression analysis of chitinase upon challenge  
611 inoculation to *Alternaria* wounding and defense inducers in *Brassica juncea*. *Biotechnology*  
612 *Reports* **13**, 72–79 (2017).
- 613 50. Lima, V. M. *et al.* Bean class IV chitinase promoter is modulated during plant development and  
614 under abiotic stress. *Physiologia Plantarum* **116**, 512–521 (2002).
- 615 51. Takenaka, Y., Nakano, S., Tamoi, M., Sakuda, S. & Fukamizo, T. Chitinase Gene Expression in  
616 Response to Environmental Stresses in *Arabidopsis thaliana*: Chitinase Inhibitor Allosamidin  
617 Enhances Stress Tolerance. *Bioscience, Biotechnology, and Biochemistry* **73**, 1066–1071 (2009).
- 618 52. Gerhardt, L. B. de A. *et al.* *Arabidopsis thaliana* class IV chitinase is early induced during the  
619 interaction with *Xanthomonas campestris*. *FEBS Letters* **419**, 69–75 (1997).
- 620 53. Liu, Z. *et al.* Functional and Promoter Analysis of ChiIV3, a Chitinase of Pepper Plant, in  
621 Response to *Phytophthora capsici* Infection. *Int J Mol Sci* **18**, (2017).
- 622 54. Bencke, M. *et al.* Genome-wide annotation of the soybean WRKY family and functional  
623 characterization of genes involved in response to *Phakopsora pachyrhizi* infection. *BMC Plant*  
624 *biology. London. Vol. 14, no. 236, (Sep. 2014), p. 1-18* (2014).
- 625 55. Park, H. C. Pathogen- and NaCl-Induced Expression of the SCaM-4 Promoter Is Mediated in Part  
626 by a GT-1 Box That Interacts with a GT-1-Like Transcription Factor. *PLANT PHYSIOLOGY* **135**,  
627 2150–2161 (2004).
- 628 56. Tao, Y. *et al.* Cloning and Functional Analysis of the Promoter of a Stress-inducible Gene  
629 (ZmRXO1) in Maize. *Plant Mol Biol Rep* **33**, 200–208 (2015).
- 630 57. Robert-Seilaniantz, A., Navarro, L., Bari, R. & Jones, J. D. Pathological hormone imbalances.  
631 *Current Opinion in Plant Biology* **10**, 372–379 (2007).
- 632 58. Loehrer, M., Langenbach, C., Goellner, K., Conrath, U. & Schaffrath, U. Characterization of  
633 nonhost resistance of *Arabidopsis* to the Asian soybean rust. *Molecular Plant-Microbe*  
634 *Interactions* **21**, 1421–1430 (2008).

- 635 59. Campe, R., Loehrer, M., Conrath, U. & Goellner, K. *Phakopsora pachyrhizi* induces defense  
636 marker genes to necrotrophs in *Arabidopsis thaliana*. *Physiological and Molecular Plant*  
637 *Pathology* **87**, 1–8 (2014).
- 638 60. van Loon, L. C., Rep, M. & Pieterse, C. M. J. Significance of inducible defense-related proteins in  
639 infected plants. *Annu Rev Phytopathol* **44**, 135–162 (2006).
- 640 61. Rakwal, R., Yang, G. & Komatsu, S. Chitinase induced by jasmonic acid, methyl jasmonate,  
641 ethylene and protein phosphatase inhibitors in rice. *Mol Biol Rep* **31**, 113–119 (2004).
- 642 62. Mazarei, M., Elling, A. A., Maier, T. R., Puthoff, D. P. & Baum, T. J. GmEREBP1 Is a  
643 Transcription Factor Activating Defense Genes in Soybean and Arabidopsis. *Molecular Plant-*  
644 *Microbe Interactions* **20**, 107–119 (2007).
- 645 63. Samac, D. & Shah, D. Developmental and Pathogen-Induced Activation of the Arabidopsis  
646 Acidic Chitinase Promoter. *Plant Cell* **3**, 1063–1072 (1991).
- 647 64. Cormack, B. P., Valdivia, R. H. & Falkow, S. FACS-optimized mutants of the green fluorescent  
648 protein (GFP). *Gene* **173**, 33–38 (1996).
- 649 65. Verdaguier, B., de Kochko, A., Fux, C. I., Beachy, R. N. & Fauquet, C. Functional organization of  
650 the cassava vein mosaic virus (CsVMV) promoter. *Plant Mol. Biol.* **37**, 1055–1067 (1998).
- 651 66. Matringe, M., Sailland, A., Pelissier, B., Rolland, A. & Zink, O. p-Hydroxyphenylpyruvate  
652 dioxygenase inhibitor-resistant plants. *Pest Management Science* **61**, 269–276 (2005).
- 653 67. Murashige, T. & Skoog, F. A Revised Medium for Rapid Growth and Bio Assays with Tobacco  
654 Tissue Cultures. *Physiologia Plantarum* **15**, 473–497 (1962).
- 655 68. Hirschburger, D., Müller, M., Voegelé, R. T. & Link, T. Reference Genes in the Pathosystem  
656 *Phakopsora pachyrhizi*/ Soybean Suitable for Normalization in Transcript Profiling. *Int J Mol Sci*  
657 **16**, 23057–23075 (2015).
- 658 69. Zhong, Y. *et al.* DL-β-Aminobutyric Acid-Induced Resistance in Soybean against *Aphis glycines*  
659 Matsumura (Hemiptera: Aphididae). *PLOS ONE* **9**, e85142 (2014).

660

661

662

663



664 **FIGURES**

665

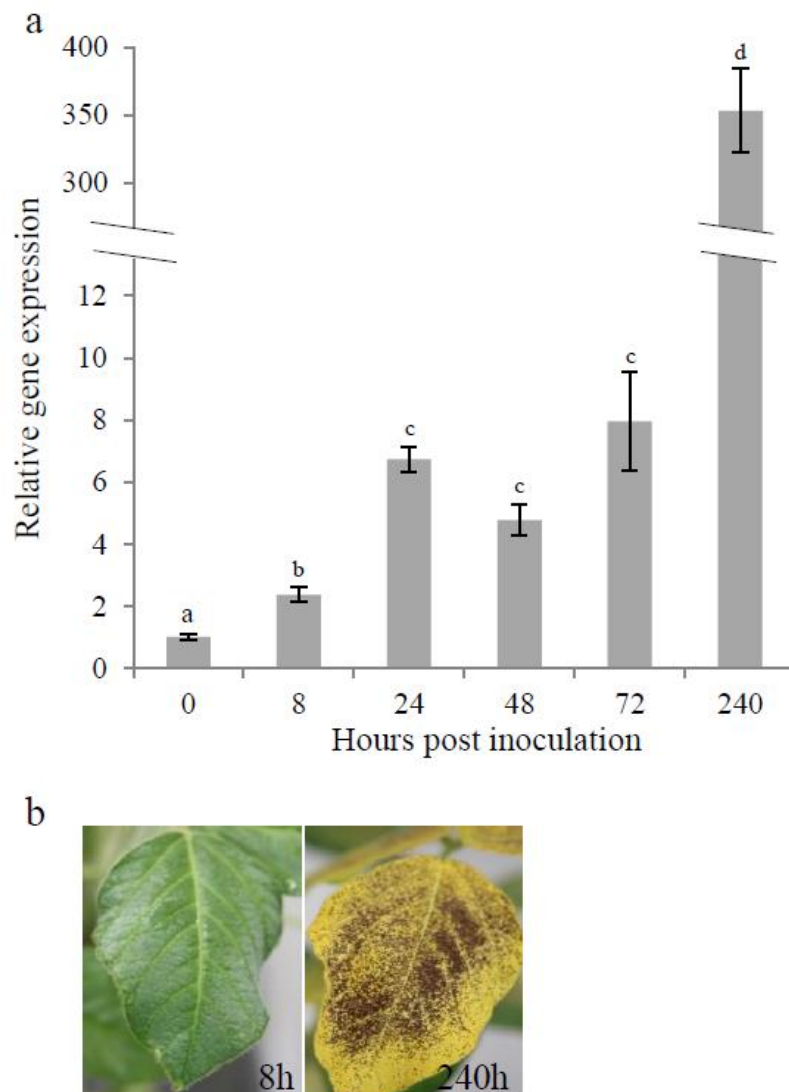

666

667 **Figure 1:** Relative expression of *GmCHIT1* in soybean leaves during *P. pachyrhizi* infection. (a)  
668 Quantitative RT-qPCR analysis was carried out to quantify *GmCHIT1* transcript accumulation at 0, 8,  
669 24, 48, 72 and 240 hpi compared to that in the mock-treated plants. The actin (GenBank:  
670 NM\_001289231.2) and an unknown protein (GenBank: BE330043)<sup>68</sup> encoding genes were used as  
671 references. Three independent biological replicates  $\pm$  standard errors. Different letters indicate a  
672 significant difference determined by a Student's t-test ( $p < 0.05$ ) between time point of inoculation. (b)  
673 Stages of infection of soybean leaves at 8 and 240 hpi.

674

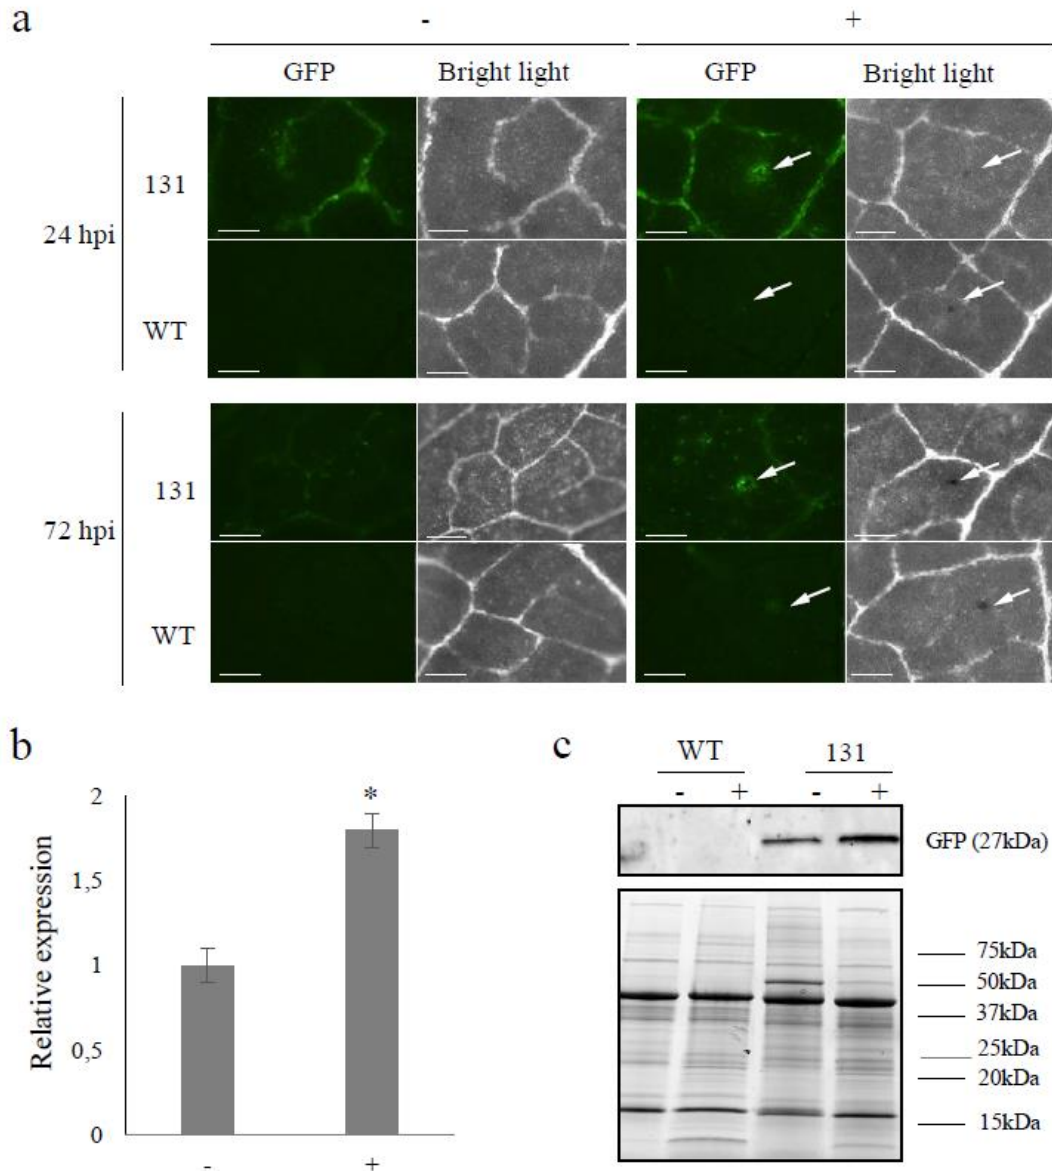

675

676 **Figure 2:** Detection of GFP in stable transgenic soybeans. (a) Leaves of T1 lines 131 transformed  
677 with the *pGmCHIT1:GFP* construction were observed using a dissection scope (Leica Z16 APO)  
678 under GFP filter and bright light at 24 and 72 hours after. *P. pachyrhizi* inoculation (+) or mock  
679 treatment (-). Arrows indicate the inoculation spots. Bar-scales represent 200  $\mu$ m. (b) Relative  
680 expression of *GFP* in 131 line (*pGmCHIT:GFP*) at 72 h after. *P. pachyrhizi* inoculation (+) and non-  
681 infected (-) plants. The actin (GenBank: NM\_001289231.2) and an unknown protein (GenBank:  
682 BE330043)<sup>68</sup> encoding genes were used as references. Three independent biological replicates  $\pm$   
683 standard errors are shown. \*: significant difference between treated (+) and untreated (-) leaves  
684 determined by a Student's t-test ( $p < 0.05$ ). (c) Detection of GFP protein 72 hours after. *P. pachyrhizi*

685 inoculation in WT and 131 line plants by immunoblotting with an antibody raised against the GFP.  
 686 Homogenous loading was checked on the gel by Strain Free detection technology (Biorad, US)  
 687 (below).  
 688

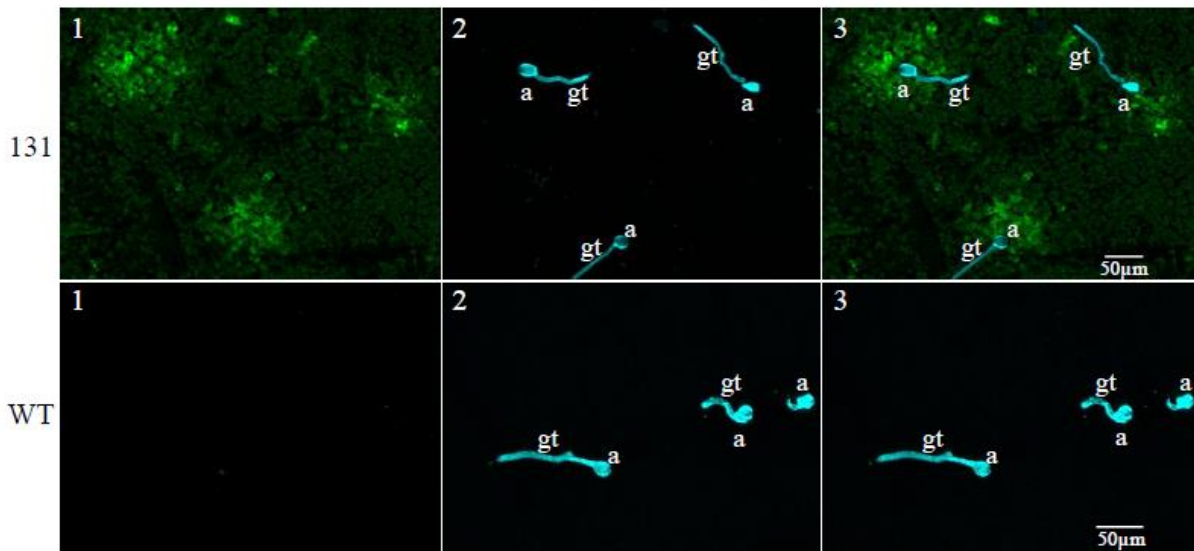

689  
 690 **Figure 3:** Representative confocal image (z-stack projection) showing GFP induction around *P.*  
 691 *pachyrhizi* appressoria at 24 hpi. Fungal structures on the leaf surface are stained in blue with  
 692 calcofluor. a: appressoria, gt: germ tube. Picture 1: GFP detection. Picture 2: calcofluor staining.  
 693 Picture 3: merging of pictures 1 and 2. The observations were conducted on 131 (*pGmCHIT1*:GFP)  
 694 and WT plants.  
 695

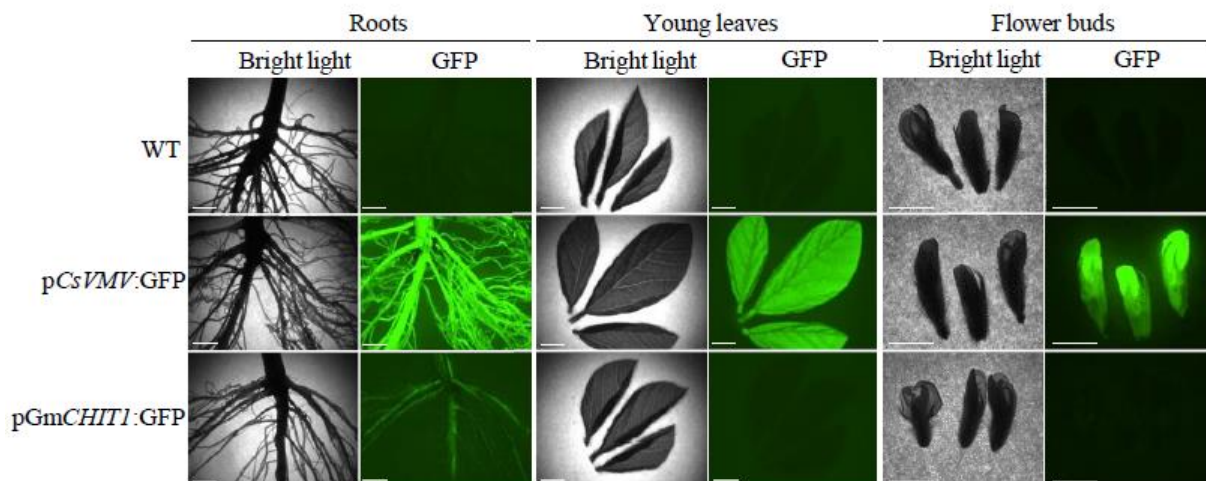

696

697 **Figure 4:** GFP activity mediated by *GmCHIT1* promoter (line 131 p*GmCHIT1*:GFP) in soybean  
698 tissues (roots, leaves, flower buds). Plants transformed with p*CsVMV*:GFP were used as a positive  
699 control. Bar-scales represent 5mm. Pictures were taken with a dissection scope (Leica Z16 APO)  
700 under GFP filter and bright light.  
701

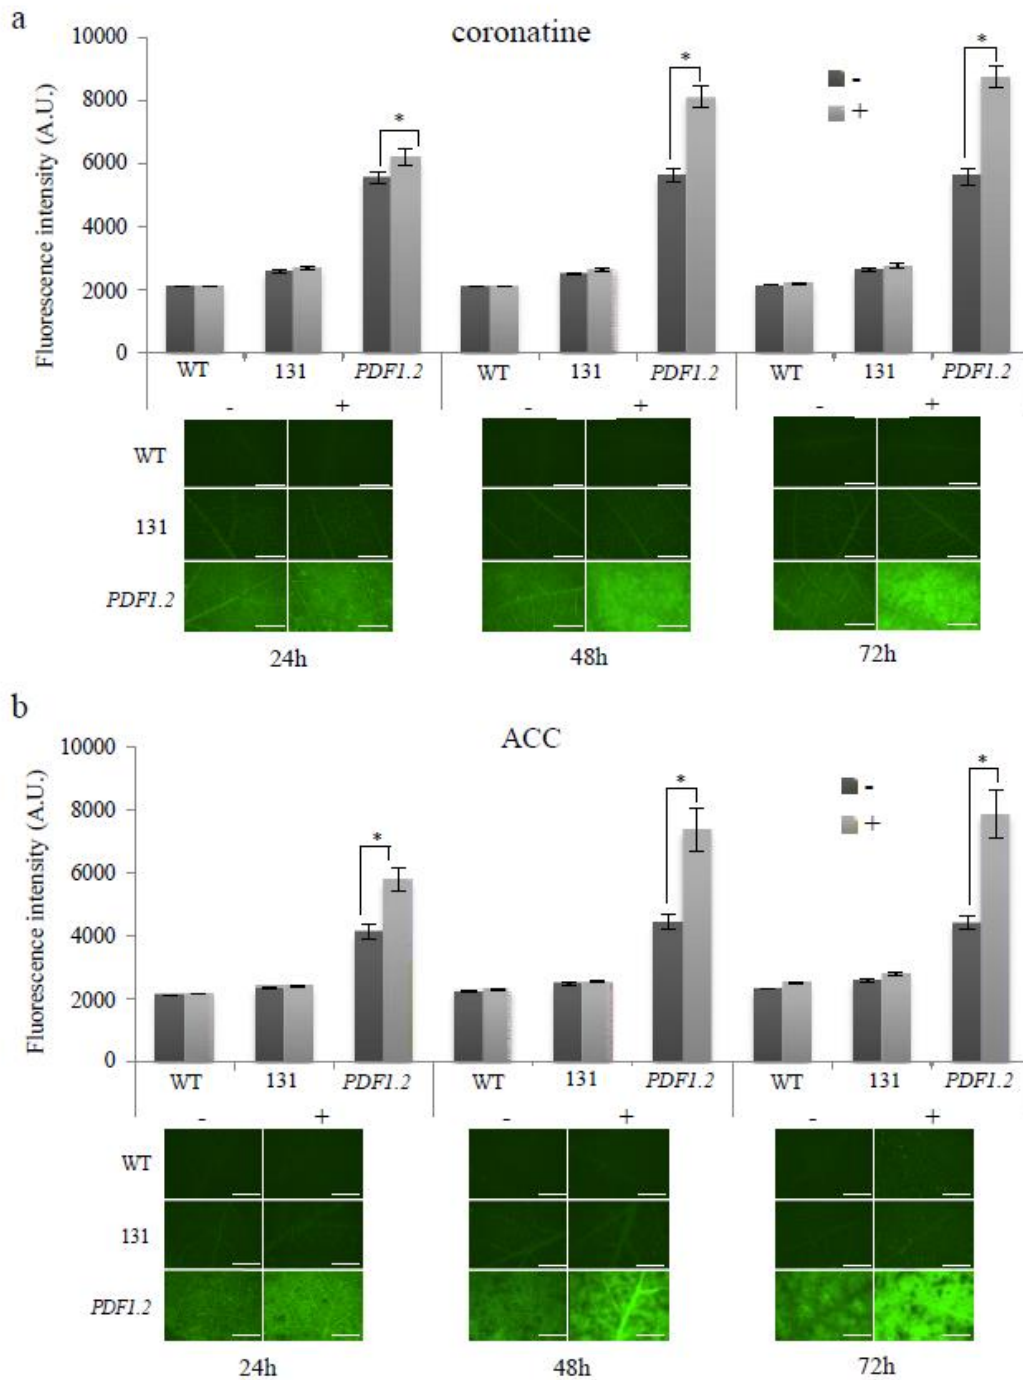

702

703 **Figure 5:** *GmCHIT1* promoter expression following hormonal treatments. GFP fluorescence observed  
704 in 131 line (p*GmCHIT1*:GFP), *PDF1.2* (p*PDF1.2*:GFP) or WT detached leaves following hormonal  
705 (+) or mock (-) treatments. Treatments were done with coronatine (a) and ACC (b). Graphics represent  
706 the mean  $\pm$  standard errors of fluorescence intensity measured with MetaMorph software *via* grayscale  
707 value on 20 biological replicates. \*: significant difference between treated (+) and untreated (-) leaves  
708 determined by a Student's t-test ( $p < 0.05$ ). Representative images of the observed fluorescence are  
709 shown under the graphs. Bar-scales represent 5mm. Observations were realized at 24, 48 and 72 hours  
710 after hormonal treatment with a dissection scope (Leica Z16 APO) under GFP filter.  
711

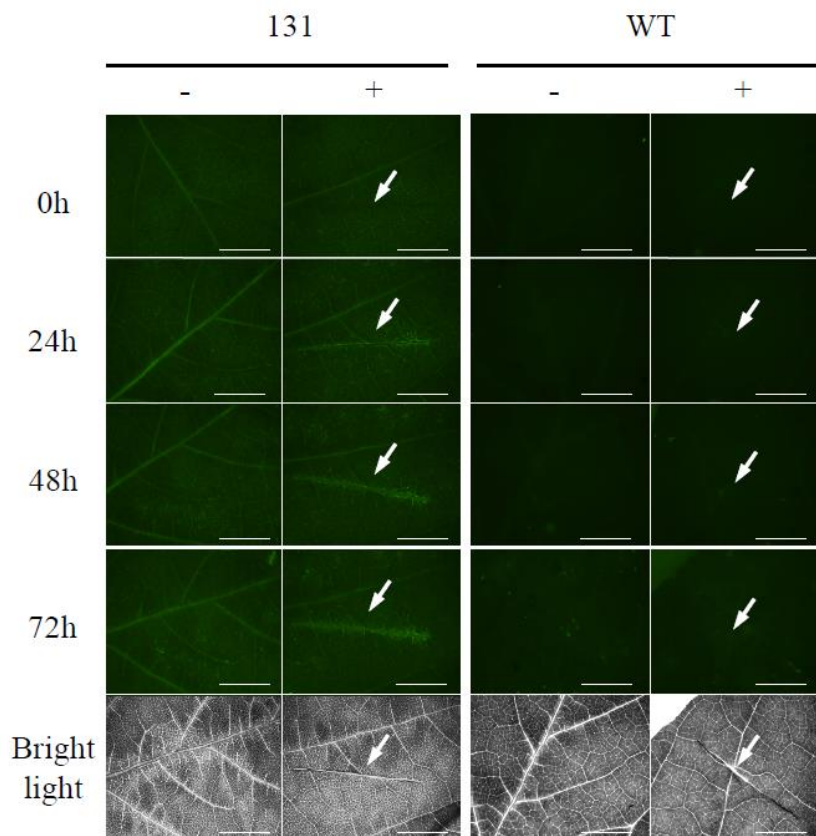

712  
713 **Figure 6:** *GmCHIT1* promoter response after wounding. GFP fluorescence in wounded (+) or control  
714 (-) detached leaves from transgenic soybean (line 131 with the GFP fused to the *GmCHIT1* promoter)  
715 and WT plants. Bar-scale represents 5mm. Observations at 0, 24, 48 and 72 hours after wounding  
716 with a dissection-scope (Leica Z16 APO) under GFP filter and bright light. Arrows show the wounded part.  
717
